# Supplementary material for: Facile exfoliation of MoS2 nanosheets by protein as a photothermal-triggered drug delivery system for synergistic tumor therapy
Source: Royal Society of Chemistry journal article supplement (doi:10.1039/c6ra13993k), 2016-01-01
Supplement: c6ra13993k1.pdf [file c6ra13993k1.pdf]

## Supplementary information

### **Facile exfoliation of MoS<sub>2</sub> nanosheets by protein as a photothermal-triggered drug delivery system for synergistic tumor therapy†**

Rui Deng <sup>a‡</sup>, Hai Yi <sup>a‡</sup>, Fangyi Fan <sup>a</sup>, Li Fu <sup>a</sup>, Yan Zeng <sup>a</sup>, Yi Wang <sup>a</sup>, Yecheng Li <sup>a</sup>,  
Yilan Liu <sup>a</sup>, Shengjun Ji <sup>b</sup>, and Yi Su <sup>a\*</sup>

<sup>a</sup> Hematology Department and Hematopoietic Stem Cell Transplantation and Cell Immunotherapy Center, Cheng Du Military General Hospital of PLA, Cheng Du, Sichuan 610083, China.

<sup>b</sup> Urology Department, Cheng Du Military General Hospital of PLA, Cheng Du, Sichuan 610083, China.

\*Correspondence: Yi Su

E-mail: yisu0109@sina.com; Tel: +86-028-86570701

† Electronic supplementary information (ESI) available

‡ These authors contributed equally to this paper

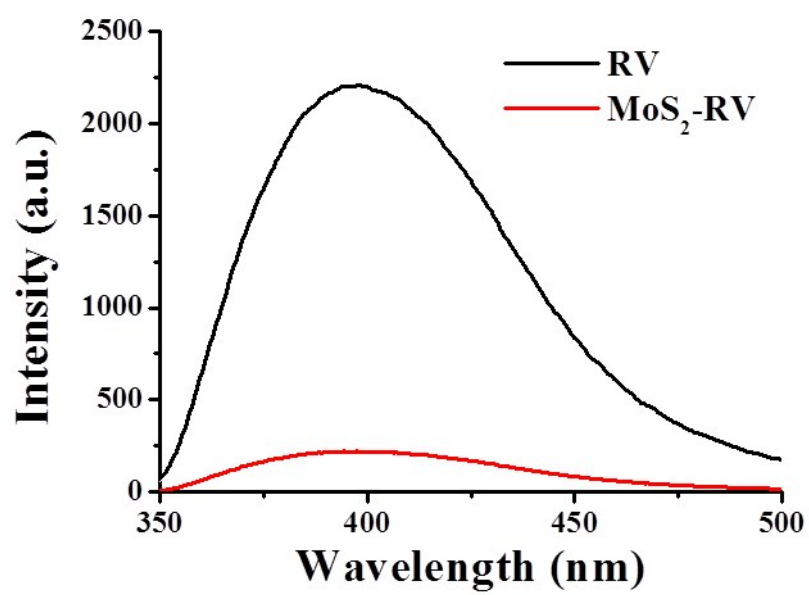

**Figure S1** The fluorescence spectra of free RV and MoS<sub>2</sub>-RV.

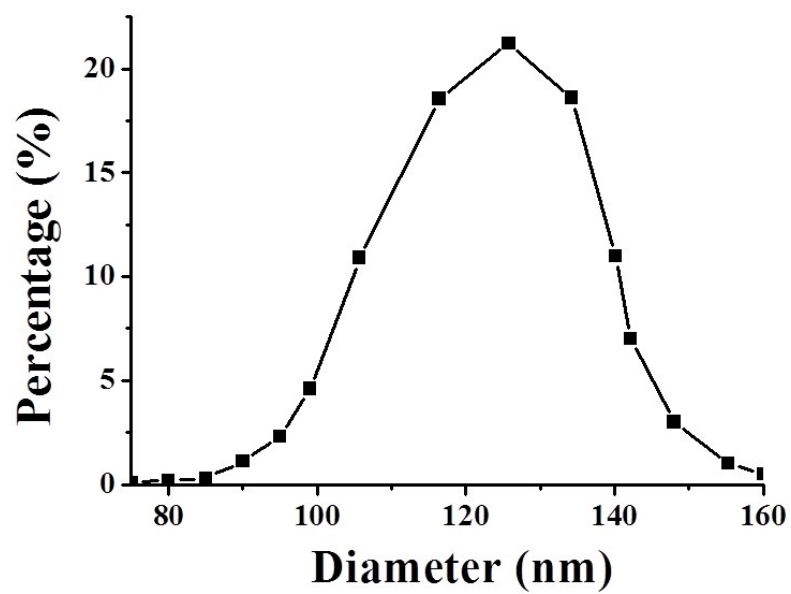

**Figure S2** The size distribution of MoS<sub>2</sub>-RV.

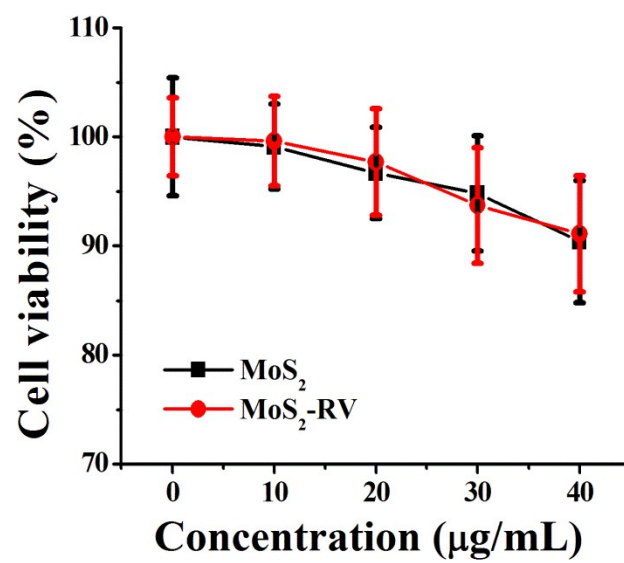

**Figure S3** The in vitro cytotoxicity of MoS<sub>2</sub> and MoS<sub>2</sub>-RV on bone marrow cells.

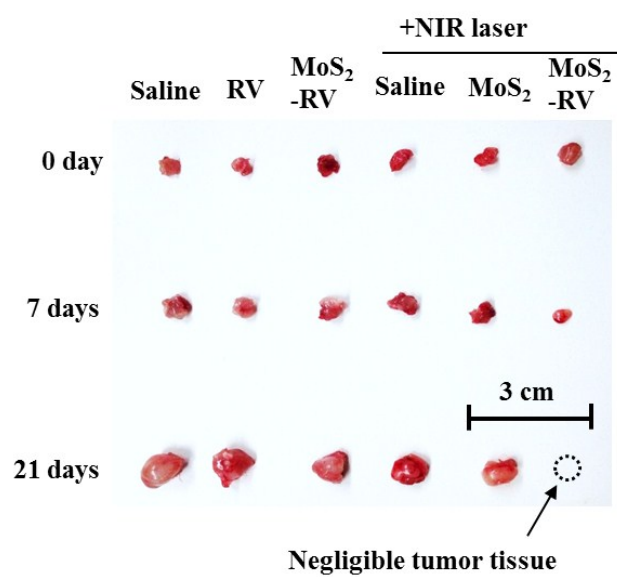

**Figure S4** Tumor appearance of the tumor bearing mice before and after 7 and 21 days' treatment.

**Table S1** Blood cell count of peripheral blood cells including WBC, RBC and platelets.

|                                  | <i>MoS<sub>2</sub></i> |               |                | <i>MoS<sub>2</sub>-RV</i> |               |                |
|----------------------------------|------------------------|---------------|----------------|---------------------------|---------------|----------------|
|                                  | <i>Control</i>         | <i>7 days</i> | <i>21 days</i> | <i>Control</i>            | <i>7 days</i> | <i>21 days</i> |
| <i>WBC</i><br>( $10^9/L$ )       | 8.01±5.9               | 7.59±6.9      | 8.14±5.1       | 7.87±5.7                  | 7.66±3.8      | 7.42±4.5       |
| <i>RBC</i><br>( $10^{12}/L$ )    | 4.85±1.8               | 5.01±2.3      | 4.91±1.9       | 4.71±1.4                  | 4.51±2.1      | 4.38±1.7       |
| <i>Platelets</i><br>( $10^9/L$ ) | 250±54                 | 241±46        | 254±61         | 242±65                    | 239±51        | 250±58         |

*WBC, White blood cells; RBC, Red blood cells.*
